# Supplementary material for: Phenotype-dependent apoptosis signalling in mesothelioma cells after selenite exposure
Source: PubMed Central journal article supplement (PMC2711967; doi:10.1186/1756-9966-28-92), 2009-06-29

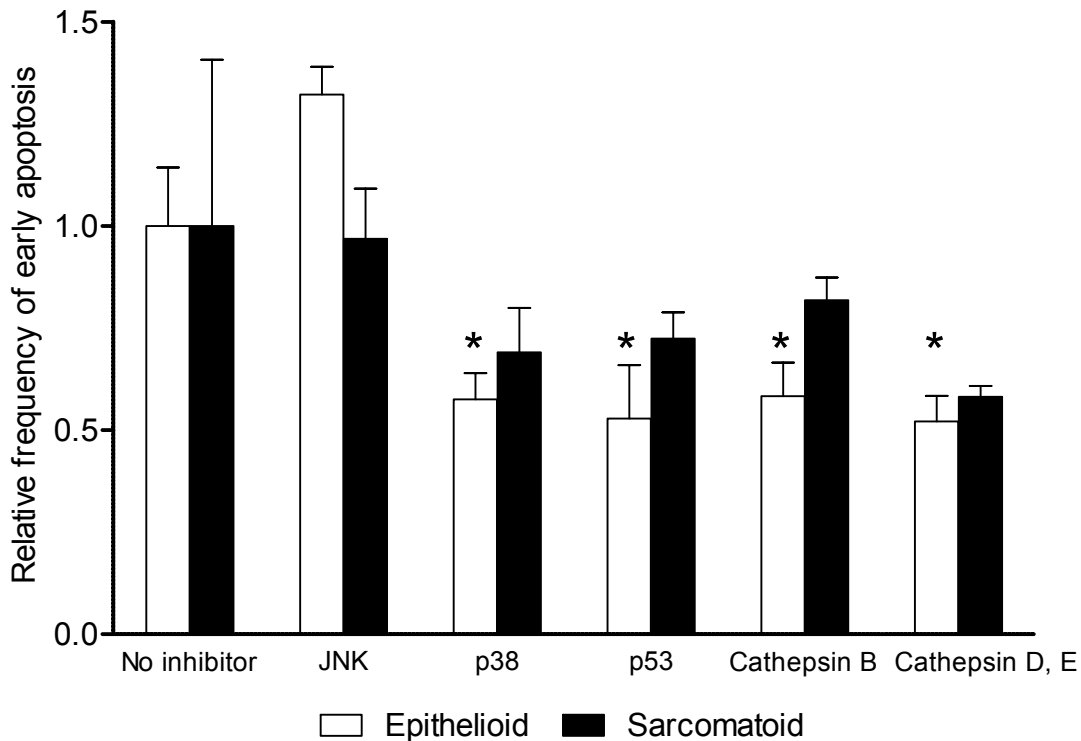

Supplement: 1756-9966-28-92-S1.pdf [file 1756-9966-28-92-S1.pdf]
